# Supplementary material for: Genetic Profiling of the Isoprenoid and Sterol Biosynthesis Pathway Genes of Trypanosoma cruzi
Source: PubMed Central journal article supplement (PMC4020770; doi:10.1371/journal.pone.0096762), 2014-05-14
Supplement: pone.0096762.s001.pdf [file pone.0096762.s001.pdf]

**Figure S1. Cosentino RO and Agüero F. Genetic profiling of the isoprenoid and sterol biosynthesis pathways of *Trypanosoma cruzi*.**

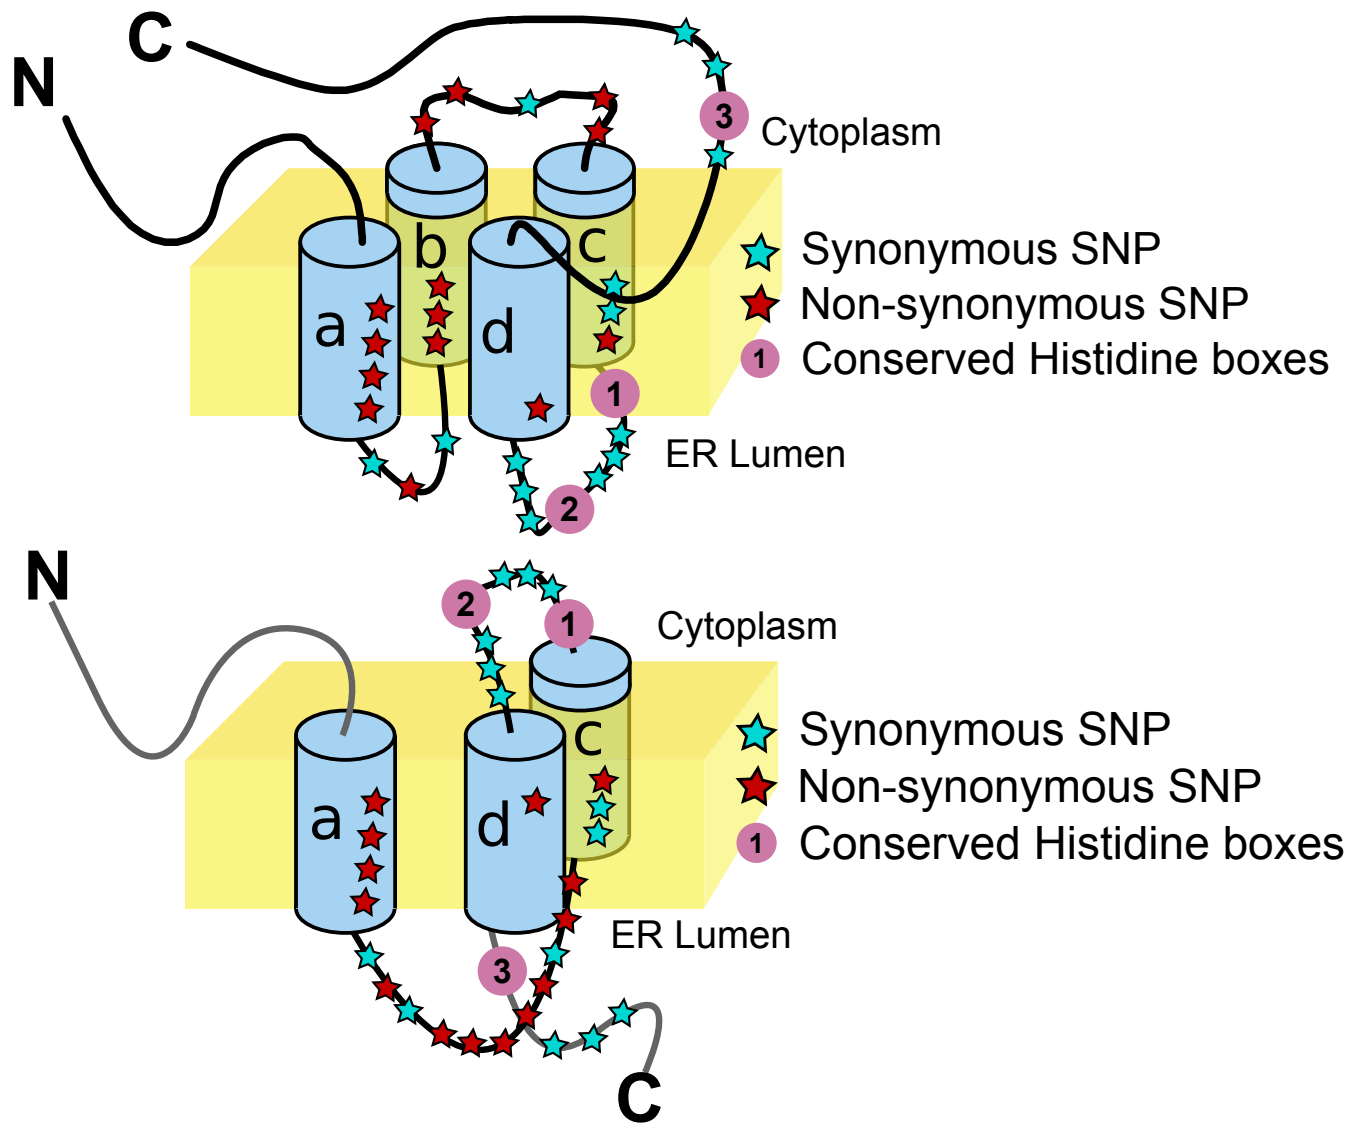

TcCLB.509235.20  
TcCLB.511339.20  
Sterol Methyl Oxidase - like

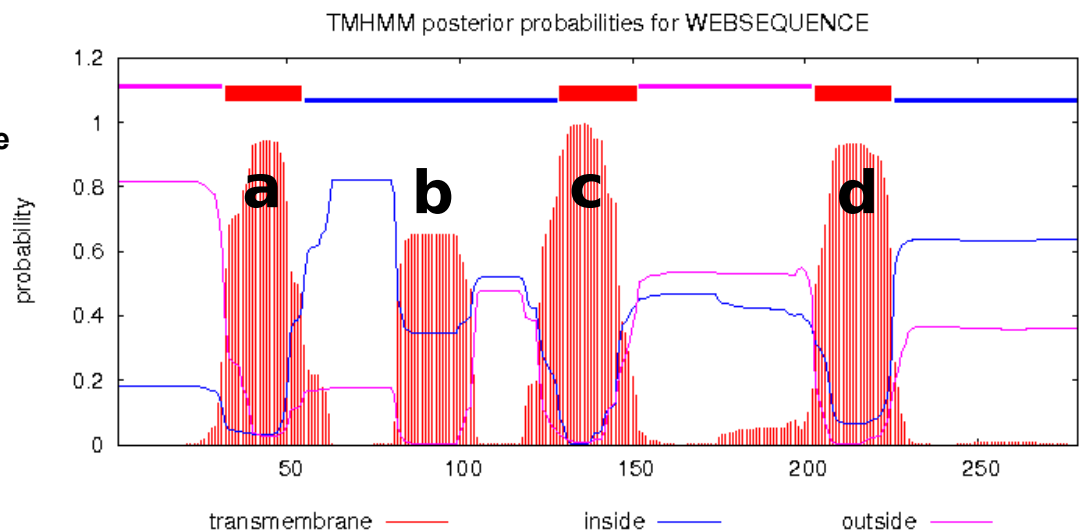

**Distribution of observed SNPs in the TcSMO-like genes of *T. cruzi*.** Based on the prediction of transmembrane spanning domains (see TMHMM probability plot at the bottom), we created two alternative representations, following Sperling, Ternes, Zank, and Heinz (2003). The distribution of synonymous and non-synonymous SNPs is shown according to these models. The representations differ in the presence/absence of the second (non-predicted) trans-membrane domain. In these two representations the location of the 3rd histidine box always lies on the opposite side of the membrane. Both topologies may be wrong and an in-depth study (similar to the one performed by Diaz AR, et al, 2002, J Biol Chem 277: 48099) may be required to establish the correct topology of these proteins.
