# Supplementary material for: Genetic Profiling of the Isoprenoid and Sterol Biosynthesis Pathway Genes of Trypanosoma cruzi
Source: PubMed Central journal article supplement (PMC4020770; doi:10.1371/journal.pone.0096762), 2014-05-14
Supplement: pone.0096762.s002.pdf [file pone.0096762.s002.pdf]

## dN/dS trajectory

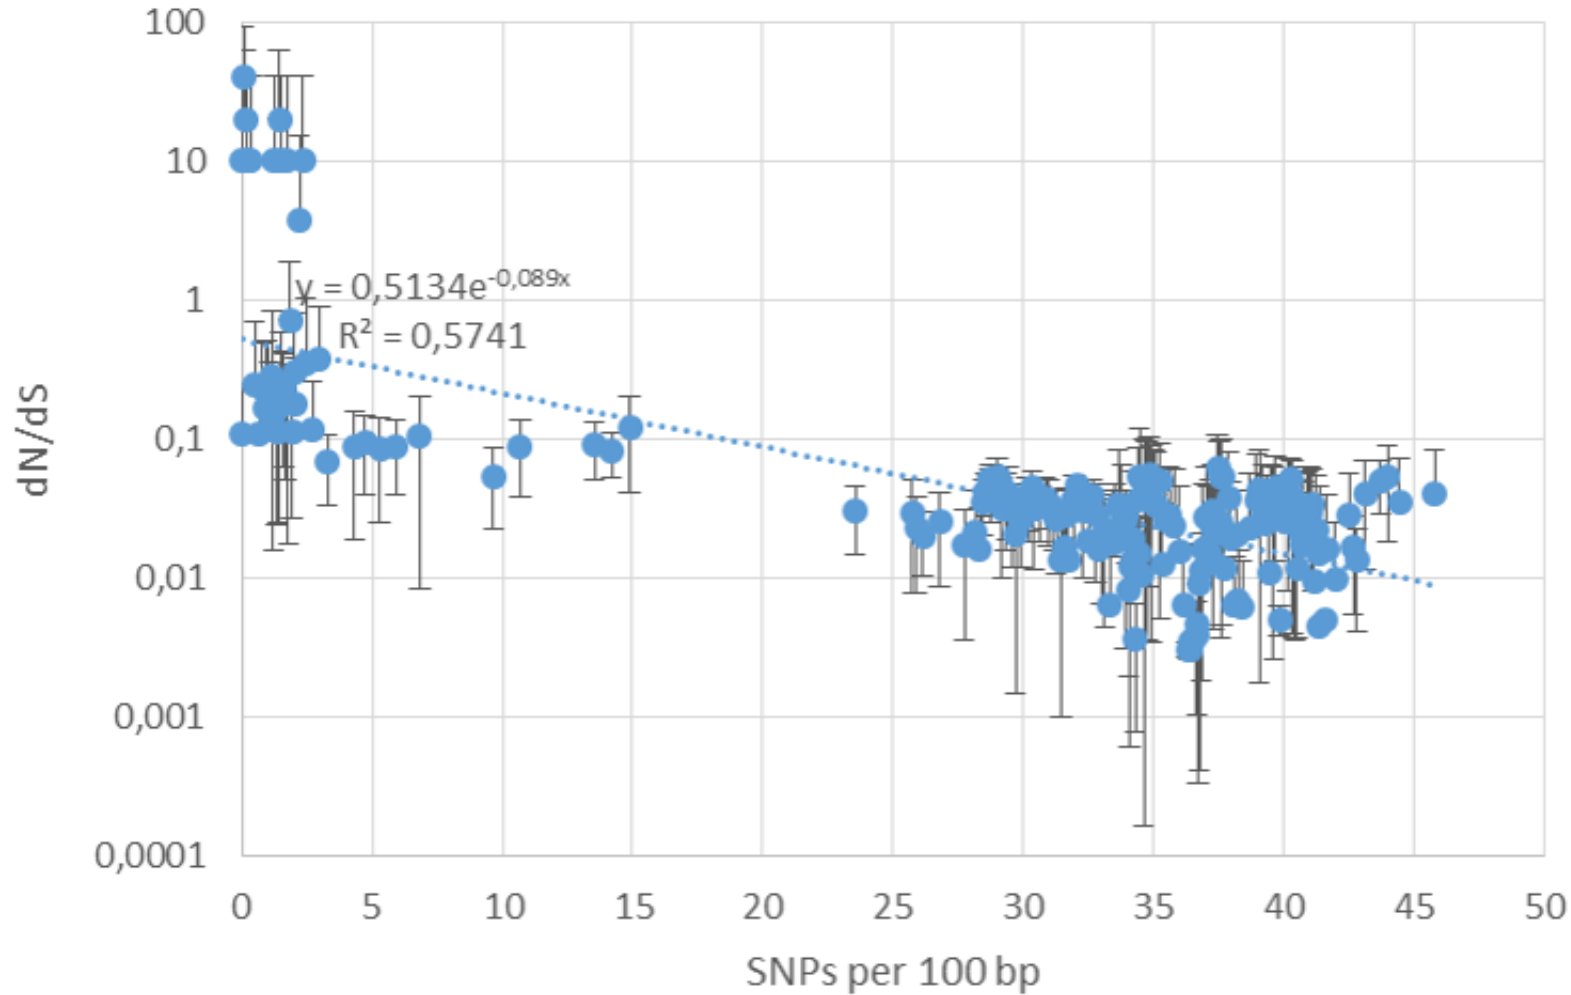

Stability of the dN/dS ratio for the trypanosomatid isoprenoid and ergosterol biosynthesis genes. The dN/dS ratio was calculated for all possible pairwise comparisons of each gene within each phylogenetic group/branch (e.g. the genes for all lanosterol demethylases were aligned with each other within the *T. cruzi* group, the *Leishmania* group and the *T. brucei*/African trypanosomes group). The plot therefore summarizes data from all genes in the pathways, and for all species analyzed. The dN/dS values were then sorted, grouped in bins of 10 and plotted. The error bars show the standard deviation within each bin.
